# Supplementary material for: Insulin signaling controls neurotransmission via the 4eBP-dependent modification of the exocytotic machinery
Source: eLife. 2016 Aug 15;5:e16807. doi: 10.7554/eLife.16807 (PMC5012858; doi:10.7554/eLife.16807)
Supplement: Figure 1—source data 1. — Values for each animal (n = 7) are shown with time bins indicating time relative to the application of hypertonic recording solution. The results of Student’s t-tests for each 5-s time bin and the Kolmogorov-Smirnov test of the distributions are presented with data set. DOI: http://dx.doi.org/10.7554/eLife.16807.004 [file elife-16807-fig1-data1.xlsx]

## Sheet: Sheet1
Source file for frequeny values in respons to hypertonic stimulation (Figure 1J)
Analysis of ave frequency distributions 1X vs. 2X
Kolmogorov-Smirnov test
P value	0.3752
Exact or approximate P value?	Approximate
P value summary	ns
Significantly different? (P < 0.05)	No
Kolmogorov-Smirnov D	0.3333
	Time (s after hypertonic stimulation)
	-15s	-10s	-5s	0s	5s	10s	15s	20s	25s	30s	35s	40s	45s	50s	55s
1X Diet
Animal 1	1.8	2	0.8	7.8	8.4	6.8	5.6	5.8	3.2	0.8	1.6	1.4	1.6	1.8	0.6
Animal 2	1	0.8	1.2	9	7.6	6.2	7.6	8.4	7.2	8	8.8	6.4	5	4.2	2
Animal 3	0.8	1.4	2	8.6	7.4	8.2	10.6	9.2	7.6	3.8	1	5.4	5.2	4.4	3.2
Animal 4	0.8	2	1.2	2.2	2.8	3.4	2.4	0.8	1.2	1.4	4.6	1	1	3.4	0.2
Animal 5	3.2	2	2.4	2.4	3.2	2.6	2	2.2	2.4	1	2.2	2	3.8	4.2	4.4
Animal 6	0.6	1.8	1	2.6	2.6	1.8	2	3.6	2.8	3.4	2	2.4	3.6	2.2	4.2
Animal 7	1.8	1.6	2.6	3	3.6	5.6	4.4	1	2.8	3.4	4	1	2.8	0	1.8
ave	1.42857	1.65714	1.6	5.08571	5.08571	4.94286	4.94286	4.42857	3.88571	3.11429	3.45714	2.8	3.28571	2.88571	2.34286
sem	0.347586	0.167413	0.272554	1.20622	0.973807	0.897313	1.23034	1.30013	0.938953	0.941991	1.01579	0.830376	0.602941	0.616993	0.625969
2X Diet
Animal 1	3.2	2	2.4	5.6	4	4.8	3.6	3.2	1.8	2.8	4.2	3.6	3.6	6	3.2
Animal 2	1	0.8	1.2	2.6	4.2	5.4	5.6	5.6	9.6	10.6	7.8	8.4	6.2	5.2	2.6
Animal 3	0.8	2	1.2	3.8	4.6	5.8	5	4	5.8	6	6.2	6.8	5.2	4	5.4
Animal 4	2	1.6	3	9.8	8.4	4.8	5.6	5.8	3.2	0.8	1.6	1.4	1.6	1.8	0.6
Animal 5	2.2	3.4	3.2	2.4	3.2	2.6	2	2.2	2.4	0.6	0.4	2.2	3.8	3.4	4.4
Animal 6	1.6	1.6	2.8	3	3.6	5.6	5	1	2.8	3.4	3.8	1	2.8	2.2	1.8
Animal 7	1.6	1.6	2	3.4	3.6	3.6	4.5	4.4	4	1	1.6	1.4	1.6	1.8	0.6
ave	1.77143	1.85714	2.25714	4.37143	4.51429	4.65714	4.47143	3.74286	4.22857	3.6	3.65714	3.54286	3.54286	3.48571	2.65714
sem	0.303718	0.298294	0.310803	0.989881	0.670262	0.440161	0.487322	0.661476	1.0202	1.37183	1.01204	1.10902	0.654238	0.633745	0.691051
Student's T-test- 1X vs 2X for each timepoint
p value	0.471905	0.569587	0.137893	0.655303	0.637534	0.779853	0.727844	0.646728	0.808873	0.775365	0.891384	0.601627	0.777497	0.510413	0.741888
