# Supplementary material for: Insulin signaling controls neurotransmission via the 4eBP-dependent modification of the exocytotic machinery
Source: eLife. 2016 Aug 15;5:e16807. doi: 10.7554/eLife.16807 (PMC5012858; doi:10.7554/eLife.16807)
Supplement: Figure 6—source data 1. — Included are data for quantification max pixel intensities for the Cpx staining presented in Figure 6C,D,J, and Figure 6—figure supplement 1. Data are presented in separate sheets as labeled. The results of statistical analyses (Student’s t-test, Kolmogorov-Smirnov test) are presented with each data set. DOI: http://dx.doi.org/10.7554/eLife.16807.013 [file elife-16807-fig6-data1.xlsx]

## Sheet: Fig. 6C, D-1X, 2X, 2X chico
Figure 6 Source File for maximum pixel intensity analysis of complexin intensity
E49/+ - 1X	n=8 synapses (672 data points)
E49/+ - 2X	n=11 synapses (700 data points)
E49/chico - 2X	n=10 synapses (605 data points)
Statistical analyses
Kolmogorov-Smirnov test		E49/+ - 1X vs E49/+ - 2X
P value	< 0.0001
Exact or approximate P value?	Approximate
P value summary	****
Significantly different? (P < 0.05)	Yes
Kolmogorov-Smirnov D	0.3319
Kolmogorov-Smirnov test		E49/+ - 2X vs E49/chico - 2X
P value	0.0008
Exact or approximate P value?	Approximate
P value summary	***
Significantly different? (P < 0.05)	Yes
Kolmogorov-Smirnov D	0.1102
Kolmogorov-Smirnov test		E49/+ - 1X vs E49/chico - 2X
P value	< 0.0001
Exact or approximate P value?	Approximate
P value summary	****
Significantly different? (P < 0.05)	Yes
Kolmogorov-Smirnov D	0.2361
one-way ANOVA
F	83.08
P value	< 0.0001
P value summary	****
Are differences among means statistically significant? (P < 0.05)	Yes
R square	0.07764
Alpha	0.05
Tukey's multiple comparisons test	Mean Diff.	95% CI of diff.	Significant?	P value
E49 1X vs. E49 2X	-230.9	-274.0 to -187.7	Yes	< 0.0001
E49 2X vs. E49/Chico 2X	64.8	20.49 to 109.1	Yes	< 0.01
E49 1X vs. E49/Chico 2X	-166.1	-210.8 to -121.3	Yes	< 0.0001
Source data
Note: Values for maximum pixel intensities (m.p.i.) were corrected for background as described in the Methods.
E49/+ - 1X	E49/+ - 2X	E49/chico - 2X
564.17	1399.75	1062.53
320.17	1443.75	1595.53
377.17	1374.75	564.53
309.17	937.75	625.53
458.17	961.75	913.53
383.17	893.75	350.53
397.17	736.75	600.53
960.17	1051.75	650.53
692.17	1521.75	556.53
434.17	1025.75	658.53
461.17	718.75	837.53
369.17	678.75	356.53
650.17	976.75	692.53
330.17	1141.75	233.53
322.17	1377.75	828.53
469.17	1063.75	302.53
343.17	1368.75	198.53
840.17	496.75	601.53
1353.17	794.75	282.53
354.17	704.75	570.53
858.17	599.75	777.53
423.17	927.75	307.53
553.17	530.75	651.53
420.17	954.75	717.53
811.17	671.75	235.53
901.17	675.75	262.53
712.17	756.75	207.53
410.17	874.75	223.53
358.17	672.75	997.53
821.17	670.75	328.53
764.17	744.75	237.53
473.17	1228.75	342.53
747.17	699.75	175.53
624.17	696.75	197.53
368.17	663.75	1010.53
564.17	638.75	939.53
790.17	539.75	344.53
600.17	635.75	1018.53
417.17	1201.75	708.53
335.17	832.75	1083.53
734.17	1424.75	229.53
377.17	1898.75	272.53
319.17	757.75	232.53
533.17	715.75	255.53
585.17	788.75	715.53
419.17	848.75	411.53
624.17	691.75	179.53
414.17	694.75	497.53
452.17	933.75	705.53
341.17	1161.75	209.53
635.17	1104.75	185.53
515.17	1204.75	921.53
377.17	1207.75	192.53
419.17	798.75	385.53
453.17	996.75	251.53
382.17	607.75	676.53
372.17	484.75	451.53
483.17	647.75	246.53
305.17	934.75	193.53
514.17	614.75	199.53
580.17	674.75	307.53
506.17	1076.75	286.53
413.17	566.75	678.53
907.17	1485.75	470.53
388.17	665.75	359.53
464.17	646.75	396.53
618.17	1041.75	221.53
1204.17	2153.75	244.53
403.17	586.75	239.53
446.17	1231.75	268.53
1159.17	1037.75	232.53
310.17	1265.75	1051.92
351.17	1020.75	1414.92
327.17	771.75	660.92
422.17	828.75	507.92
592.17	597.75	576.92
375.17	558.75	1226.92
1554.17	638.75	1279.92
368.17	534.75	460.92
346.17	828.75	1000.92
337.17	522.75	671.92
312.17	563.75	429.92
628.17	625.75	514.92
866.17	428.71	979.92
1061.17	628.71	1166.92
425.17	577.71	369.92
514.17	1523.71	551.92
383.17	1516.71	1968.92
322.17	500.71	433.92
320.17	565.71	1115.92
382.17	576.71	828.92
403.17	508.71	961.92
373.17	976.71	458.92
470.17	1062.71	637.92
452.17	720.71	447.92
391.17	828.71	397.92
420.17	407.71	617.92
382.17	575.71	913.92
311.17	963.71	496.92
428.17	950.71	1486.92
512.17	724.71	1222.92
441.17	362.71	1089.92
299.17	405.71	662.92
400.17	948.71	601.92
371.17	355.71	897.92
448.17	836.71	841.92
343.17	665.71	694.92
321.17	889.71	568.92
464.17	698.71	470.92
477.17	1419.71	409.92
753.11	755.71	858.92
528.11	1055.71	776.92
524.11	1150.71	666.92
547.11	953.71	460.92
477.11	576.71	486.92
570.11	1204.71	690.92
511.11	799.71	392.92
361.11	555.71	689.92
403.11	659.71	543.92
579.11	936.71	607.92
862.11	523.71	483.92
542.11	1669.71	340.92
840.11	852.71	390.92
997.11	471.71	822.92
585.11	509.71	474.92
844.11	588.71	648.92
1031.11	547.71	730.92
714.11	510.38	664.92
757.11	627.38	609.92
487.11	732.38	1948.39
812.11	1325.38	1814.39
739.11	440.38	1883.39
630.11	469.38	1551.39
722.11	1509.38	1146.39
715.11	2015.38	850.39
716.11	600.38	1614.39
935.11	648.38	981.39
617.11	1287.38	1186.39
958.11	518.38	1013.39
534.11	653.38	573.39
546.11	726.38	732.39
634.11	1229.38	484.39
425.11	546.38	1000.39
758.11	605.38	625.39
644.11	530.38	404.39
526.11	1575.38	509.39
452.11	850.38	765.39
1068.11	676.38	597.39
508.11	929.38	653.39
604.11	619.38	425.39
432.11	757.38	1813.38
930.11	646.38	1065.38
489.11	471.38	1218.38
452.11	478.38	1670.38
374.11	827.38	479.38
703.11	457.38	1565.38
535.11	1359.38	1358.38
444.11	634.38	576.38
914.11	1478.38	1081.38
910.11	713.38	1009.38
1037.11	1683.38	625.38
669.11	546.38	913.38
571.11	945.38	858.38
591.11	1226.38	495.38
466.11	452.38	1650.38
632.11	1029.38	602.38
494.11	1538.38	2146.38
744.11	1061.38	2616.38
976.11	441.38	465.38
416.11	453.38	689.38
663.11	523.38	483.38
389.11	830.38	1919.38
855.11	697.38	799.38
559.11	1816.38	611.38
861.11	954.38	771.38
1458.11	723.38	719.38
498.11	447.38	990.38
531.11	769.38	446.38
926.11	1002.38	799.38
431.11	499.38	886.38
530.11	591.38	448.38
427.11	942.38	449.38
705.4	697.38	503.38
701.4	630.38	407.38
959.4	735.38	715.38
2579.4	526.38	492.38
839.4	555.38	515.38
564.4	629.38	823.38
636.4	1026.38	491.38
716.4	665.38	554.38
1103.4	535.38	603.38
642.4	1336.38	794.38
521.4	437.38	1432.38
642.4	759.38	556.38
510.4	479.38	927.38
560.4	702.38	516.38
753.4	975.38	627.38
694.4	777.38	477.38
509.4	564.38	529.38
708.4	502.38	1063.38
512.4	617.38	1145.38
622.4	1188.38	616.38
642.4	773.38	1353.38
1003.4	525.38	461.38
770.4	719.38	409.38
547.4	529.38	441.38
1228.4	860.38	507.38
437.4	1046.38	841.38
765.4	994.38	980.38
845.4	693.38	451.38
418.4	502.38	488.38
429.4	548.38	1200.15
537.4	654.38	1530.15
498.4	475.38	1092.15
536.4	761.38	1080.15
697.4	977.38	1851.15
1014.4	479.38	1593.15
730.4	997.38	1249.15
1020.4	959.38	598.15
499.4	454.38	1043.15
1374.4	1478.38	1506.15
750.4	753.38	831.15
565.4	1159.38	499.15
630.4	431.38	405.15
530.4	509.38	343.15
526.4	687.38	387.15
611.4	1091.38	356.05
487.4	415.38	1006.05
452.4	472.38	633.05
670.4	467.38	1353.05
414.4	862.38	1707.05
411.4	578.38	673.05
689.4	700.38	426.05
1010.4	650.38	940.05
519.4	880.38	1780.05
454.4	471.38	485.05
487.4	464.38	676.05
898.4	399.38	504.05
610.4	839.31	969.05
414.4	958.31	711.05
746.4	750.31	435.05
635.4	1333.31	512.05
649.4	1371.31	858.05
995.4	1313.31	366.05
506.4	1148.31	440.05
677.4	980.31	1044.05
666.4	578.31	876.05
500.4	1456.31	798.05
529.4	951.31	665.05
485.4	591.31	451.05
560.4	703.31	907.05
614.4	1241.31	852.05
557.4	1799.31	622.05
409.4	558.31	591.05
543.4	839.31	422.05
476.4	2267.31	664.05
615.4	716.31	432.05
617.4	975.31	418.05
790.4	875.31	409.05
556.4	940.31	349.05
654.4	929.31	372.05
607.4	602.31	348.05
768.4	779.31	1805.82
438.4	595.31	709.82
465.4	1313.31	596.82
701.4	550.31	763.82
849.4	860.31	704.82
433.4	797.31	522.82
540.4	1097.31	1405.82
699.18	1220.31	412.82
448.18	796.31	512.82
799.18	834.31	1912.82
489.18	1147.31	666.82
715.18	1077.31	459.82
549.18	1008.31	624.82
615.18	1300.31	489.82
597.18	878.31	381.82
547.18	1261.31	1094.82
1407.18	537.31	902.82
494.18	716.31	733.82
418.18	737.31	524.82
431.18	619.31	372.82
503.18	878.31	690.82
367.18	681.31	513.82
885.18	690.31	563.82
605.18	919.31	729.82
372.18	648.31	646.82
586.18	864.31	477.82
708.18	1009.31	881.82
349.18	1128.31	732.82
396.18	1458.31	1747.82
718.18	1183.31	1168.82
527.18	1408.31	1124.82
461.18	660.31	516.82
873.18	1048.31	796.82
761.18	2161.31	473.82
665.18	551.31	728.82
515.18	682.31	385.82
351.18	975.31	479.82
792.18	1007.31	777.82
581.18	751.31	1016.82
395.18	862.31	589.82
576.18	970.31	1314.82
491.18	1182.85	604.82
392.18	660.85	467.82
992.18	1051.85	773.82
583.18	629.85	442.82
723.18	633.85	585.82
972.18	989.85	496.82
880.18	1174.85	664.82
385.18	1073.85	550.82
638.18	1775.85	542.82
569.18	630.85	774.82
467.18	442.85	364.82
541.18	627.85	670.82
568.18	532.85	487.82
378.18	625.85	710.82
721.18	453.85	455.82
691.18	463.85	637.82
415.18	397.85	528.82
718.18	470.85	682.82
560.18	489.85	489.82
1482.18	595.85	951.82
419.18	411.85	535.82
470.18	612.85	465.82
760.18	424.85	450.82
498.18	528.85	1010.7
544.18	1524.85	1112.7
376.18	376.85	485.7
740.18	1448.85	565.7
925.18	501.85	753.7
1374.18	1564.85	594.7
831.18	428.85	1354.7
1415.18	1180.85	691.7
1116.18	872.85	446.7
568.18	1234.85	409.7
431.18	1100.85	716.7
605.18	694.85	408.7
388.18	980.85	743.7
469.18	471.85	729.7
488.18	473.85	856.7
415.18	688.85	766.7
583.18	810.85	476.7
974.81	695.85	432.7
949.81	476.85	732.7
1045.81	1684.61	529.7
322.81	868.61	799.7
238.81	1179.61	777.7
222.81	587.61	833.7
442.81	1103.61	551.7
335.81	1549.61	725.7
572.81	818.61	473.7
243.81	1263.61	542.7
518.81	706.61	693.7
293.81	869.61	1233.7
416.81	2144.61	1228.7
223.81	680.61	453.7
852.81	755.61	1105.7
537.81	1124.61	580.7
436.81	921.61	1439.7
530.81	2336.61	1219.7
630.81	754.61	890.7
700.81	1673.61	846.7
233.81	768.61	380.7
431.81	1525.61	771.7
657.81	693.61	635.7
279.81	714.61	808.7
244.81	1528.61	907.7
777.81	960.61	835.7
411.81	709.61	404.7
268.81	1375.61	567.7
377.81	1750.61	455.7
695.81	1593.61	547.7
688.81	888.61	586.7
411.81	1668.61	506.7
257.81	873.61	475.7
491.81	1091.61	505.7
669.81	1158.61	494.7
391.81	859.61	406.7
310.81	1100.61	399.7
650.81	1886.61	402.7
519.81	847.61	2103.8
250.81	1726.61	912.8
602.81	1218.61	1002.8
407.81	905.61	1648.8
392.81	729.61	757.8
249.81	399.75	2442.8
433.81	325.75	592.8
259.81	343.75	1539.8
367.81	534.75	690.8
304.81	1649.75	630.8
534.81	1415.75	585.8
259.81	1315.75	826.8
563.81	927.75	1186.8
355.81	868.75	695.8
282.81	527.75	935.8
337.81	583.75	1512.8
374.81	1417.75	1554.8
335.81	656.75	775.8
581.81	729.75	1161.8
627.81	1306.75	1043.8
339.81	1516.75	1130.8
229.81	425.75	1272.8
634.81	464.75	1165.8
320.81	1209.75	794.8
278.81	798.75	717.8
312.81	517.75	1196.8
385.81	797.75	754.8
303.81	897.75	983.8
1107.18	724.75	949.8
659.18	933.75	462.8
1041.18	470.75	819.8
1176.18	445.75	1039.8
472.18	1058.75	1377.8
411.18	804.75	1356.8
338.18	380.75	838.8
2055.18	762.75	1085.8
1304.18	456.75	596.8
965.18	611.75	966.8
619.18	453.75	928.8
600.18	565.75	956.8
471.18	524.75	946.8
697.18	379.75	1334.8
991.18	1573.75	1333.8
594.18	877.75	1171.8
925.18	624.75	714.8
520.18	363.75	768.8
1610.18	530.75	1014.8
1672.18	447.75	925.8
419.18	850.75	640.8
918.18	431.75	563.8
1563.18	515.75	598.8
1072.18	488.75	1132.8
813.18	346.75	783.8
471.18	482.75	1078.8
448.18	527.75	743.8
473.18	487.75	508.8
550.18	775.75	552.8
902.18	378.75	577.8
395.18	374.75	538.8
643.18	513.75	693.8
500.18	363.75	829.8
1950.18	1404.75	961.8
444.18	746.75	828.8
834.18	385.75	802.8
582.18	414.75	739.8
628.18	1282.75	607.8
386.18	637.75	796.8
735.18	880.75	1034.8
483.18	551.75	795.8
475.18	448.75	580.8
999.18	1861.75	700.8
400.18	381.75	712.8
356.18	406.75	1462.8
497.18	361.75	765.8
373.18	620.75	776.8
486.18	631.75	485.8
364.18	699.36	568.8
680.18	1062.36	561.8
641.18	881.36	488.8
431.18	476.36	551.8
448.18	670.36	914.8
737.18	616.36	703.8
468.18	544.36	802.8
605.18	603.36	580.8
523.18	445.36	570.8
406.18	768.36	2119.52
1141.18	1576.36	1257.52
439.18	874.36	2153.52
408.18	382.36	1473.52
427.18	693.36	1492.52
430.18	671.36	1481.52
406.18	714.36	976.52
399.18	497.36	678.52
531.18	549.36	1431.52
583.18	724.36	627.52
542.18	745.36	491.52
365.18	621.36	643.52
700.18	544.36	723.52
727.18	529.36	949.52
680.18	427.36	1273.52
388.18	710.36	1457.52
731.18	670.36	1035.52
393.18	556.36	414.52
430.18	418.36	784.52
474.18	544.36	781.52
493.18	469.36	1347.52
526.18	388.36	472.52
551.18	363.36	1319.52
369.18	530.36	722.52
434.18	367.36	1326.52
482.18	448.36	947.52
341.18	714.36	1705.52
558.18	1202.36	1033.52
548.18	670.36	802.52
654.18	461.36	760.52
551.18	668.36	673.52
812.18	488.36	910.52
459.18	822.36	681.52
452.18	699.36	865.52
391.18	398.36	421.52
464.18	471.36	481.52
1006.18	615.36	1290.52
784.18	592.36	807.52
1261.18	506.36	464.52
533.18	438.36	842.52
432.18	771.36	465.52
440.18	1185.36	1061.52
557.18	768.36	731.52
1296.18	413.36	491.52
508.18	827.36	1251.52
416.18	651.36	1036.52
378.18	792.36	471.52
517.18	1225.36	628.52
514.18	477.36	686.52
389.18	388.36	1201.52
544.18	442.36	724.52
1501.18	584.36	1052.52
652.18	565.36	543.52
405.18	688.36	976.52
1014.18	424.36	745.52
746.18	448.36	1142.52
736.18	845.86	550.52
1539.18	783.86	507.52
608.18	557.86	1101.52
789.18	557.86	463.52
466.18	724.86	556.52
415.18	569.86	790.52
407.18	910.86	1487.52
455.18	872.86	602.52
433.18	912.86	496.52
438.31	551.86	662.52
517.31	569.86	801.52
433.31	618.86	862.52
552.31	631.86	606.52
1170.31	520.86	679.52
1191.31	629.86	996.52
1056.31	1093.86	1187.52
502.31	1133.86	564.52
535.31	1207.86	1077.52
506.31	622.86	1179.52
629.31	898.86	447.52
775.31	1213.86	528.52
436.31	695.86	894.52
720.31	578.86	898.52
378.31	1408.86	486.52
396.31	876.86	657.52
497.31	1253.86	625.52
547.31	1008.86	722.52
650.31	1227.86	504.52
453.31	624.86	448.52
813.31	640.86	763.52
1250.31	799.86	511.52
743.31	1952.86	537.52
471.31	547.86	860.52
333.31	681.86	617.52
1053.31	746.86	674.52
865.31	1331.86	880.52
739.31	558.86	887.52
790.31	1319.86	596.52
962.31	869.86	794.52
737.31	1865.86	415.52
1094.31	926.86	617.52
549.31	1763.86	993.52
767.31	1432.86	681.52
640.31	922.86	472.52
333.31	2220.86	480.52
725.31	555.86	800.52
414.31	876.86	979.52
352.31	647.86	517.52
416.31	755.86	796.52
475.5	1103.86	1005.52
757.5	1225.86	752.52
538.5	980.15	414.52
663.5	673.15	646.52
391.5	509.15	923.52
388.5	1218.15	836.52
503.5	564.15	771.52
490.5	687.15	608.52
428.5	1197.15	591.52
448.5	1497.15	450.52
512.5	1093.15	622.52
513.5	984.15	1036.52
525.5	1232.15	563.52
540.5	584.15	396.52
413.5	599.15	808.52
458.5	682.15	534.52
628.5	752.15	443.52
368.5	439.15	629.52
390.5	2638.15	707.52
381.5	494.15	899.52
687.5	790.15	520.52
487.5	799.15	672.52
701.5	929.15	552.52
427.5	928.15	759.52
701.5	701.15	427.52
713.5	449.15	528.52
364.5	746.15	455.52
743.5	635.15	540.52
401.5	485.15	476.52
381.5	964.15	878.52
280.5	689.15	410.52
865.5	807.15	781.52
587.5	905.15	567.52
325.5	493.15	416.52
325.5	790.15
289.5	858.15
301.5	685.15
582.5	976.15
378.5	896.15
316.5	1031.15
410.5	841.15
431.5	594.15
603.5	1376.15
614.5	600.15
287.5	634.15
298.5	1162.15
286.5	1216.15
546.5	1131.15
596.5	472.15
379.5	1128.15
331.5	905.15
290.5	952.15
299.5	652.15
951.5	865.15
781.5	488.15
459.5	459.15
1004.5	499.15
289.5	642.15
1327.5	816.15
316.5	744.15
414.5	659.15
768.5	893.15
384.5	1051.15
448.5	758.15
1832.5	773.15
342.5	829.15
340.5	736.15
467.5	740.15
370.5	670.15
1016.5	775.15
591.5	579.15
354.5	640.15
341.5	736.69
607.5	1204.69
367.5	1682.69
648.5	371.69
361.5	416.69
414.5	408.69
384.5	1500.69
951.5	1338.69
460.5	461.69
319.5	393.69
801.5	1212.69
688.5	464.69
445.5	1030.69
610.5	1260.69
463.5	351.69
495.5	382.69
867.5	1514.69
381.5	443.69
501.5	889.69
995.5	1025.69
421.5	467.69
382.5	664.69
423.5	685.69
977.5	472.69
909.5	624.69
807.5	1120.69
903.5	1025.69
1034.5	773.69
489.5	745.69
	463.69
	635.69
	729.69
	388.69
	538.69
	780.69
	439.69
	920.69
	540.69
	621.69
	833.69
	1166.69
	633.69
	544.69
	474.69
	735.69
	1165.69
	957.69
	1248.69
	858.69
	789.69
	566.69
	647.69
	453.69
	544.69
	668.69
	621.69
	516.69

## Sheet: Fig. 6J-wt vs cpx+
Figure 6 Source File for maximum pixel intensity analysis of complexin intensity
w- (+/+)		n= 5 synapses (509 data points)
cpx/+		n=4 synapses (470 data points)
Statistical Analyses
Kolmogorov-Smirnov test
P value	< 0.0001
Exact or approximate P value?	Approximate
P value summary	****
Significantly different? (P < 0.05)	Yes
Kolmogorov-Smirnov D	0.3571
Unpaired t test
P value	< 0.0001
P value summary	****
Significantly different? (P < 0.05)	Yes
One- or two-tailed P value?	Two-tailed
t, df	t=14.52 df=977
Source data
Note: Values for maximum pixel intensities (m.p.i.) were corrected for background as described in the Methods.
w- (+/+)	cpx/+
668.73	269.17
527.73	321.17
537.73	260.17
471.73	473.17
773.73	341.17
414.73	279.17
860.73	656.17
399.73	265.17
665.73	433.17
664.73	290.17
419.73	325.17
231.73	337.17
721.73	478.17
574.73	508.17
810.73	232.17
730.73	274.17
855.73	771.17
404.73	398.17
875.73	704.17
760.73	256.17
655.73	479.17
672.73	396.17
722.73	350.17
247.73	247.17
892.73	367.17
358.73	443.17
342.73	299.17
616.73	800.17
947.73	285.17
388.73	235.17
640.73	239.17
693.73	425.17
766.73	484.17
334.73	245.17
211.73	346.17
227.73	740.17
375.73	278.17
477.73	329.17
244.73	315.17
251.73	420.17
597.73	468.17
1151.73	429.17
1243.73	406.17
246.73	422.17
288.73	242.17
214.73	282.17
930.73	320.17
214.73	321.17
238.73	521.17
292.73	251.17
354.73	284.17
667.73	276.17
213.73	219.17
255.73	264.17
443.73	283.17
849.73	386.17
223.73	246.17
548.73	274.17
490.73	279.17
558.73	253.17
244.73	291.17
220.73	253.17
1099.73	255.17
1213.73	265.17
1072.73	405.17
554.73	222.17
453.73	332.17
716.73	249.17
739.73	585.17
1032.73	236.17
596.73	417.17
219.73	317.17
257.73	235.17
792.73	235.17
224.73	524.17
319.73	284.17
236.73	262.17
351.73	251.17
300.73	559.17
236.73	344.17
249.73	1038.17
238.73	774.17
497.73	787.17
247.73	372.17
840.73	681.17
434.73	256.17
203.73	291.17
202.73	287.17
259.73	261.17
268.73	330.17
351.49	239.17
241.49	217.17
392.49	530.17
371.49	418.17
256.49	998.17
216.49	347.17
339.49	541.17
342.49	233.17
1209.49	439.17
246.49	399.17
1077.49	622.17
1644.49	515.17
1978.49	432.17
1639.49	507.17
299.49	810.17
685.49	323.17
200.49	270.17
203.49	228.17
430.49	346.17
203.49	337.17
940.49	336.17
321.49	223.17
172.49	669.17
1081.49	383.17
276.49	526.17
214.49	578.17
301.49	434.17
664.49	286.17
266.49	305.17
303.49	386.17
335.49	255.17
796.49	563.17
631.49	218.17
204.49	234.17
1203.49	267.17
586.49	175.47
699.49	846.47
216.49	311.47
234.49	139.47
240.49	212.47
274.49	140.47
527.49	255.47
294.49	315.47
1092.49	122.47
170.49	162.47
209.49	125.47
454.49	225.47
209.49	543.47
345.49	406.47
376.49	247.47
178.49	532.47
235.49	745.47
323.49	509.47
639.49	144.47
207.49	384.47
370.49	151.47
276.49	607.47
513.49	729.47
193.49	694.47
219.49	217.47
333.49	249.47
439.89	541.47
1828.89	134.47
586.89	221.47
548.89	214.47
273.89	888.47
350.89	164.47
626.89	209.47
569.89	254.47
415.89	482.47
374.89	376.47
330.89	145.47
999.89	145.47
756.89	287.47
997.89	191.47
951.89	619.47
552.89	126.47
482.89	389.47
613.89	208.47
1142.89	496.47
277.89	149.47
298.89	1225.47
1763.89	521.47
1225.89	449.47
1283.89	194.47
1046.89	219.47
331.89	273.47
872.89	145.47
827.89	156.47
640.89	175.47
792.89	150.47
827.89	135.47
698.89	199.47
643.89	501.47
859.89	357.47
1539.89	336.47
1281.89	148.47
1014.89	198.47
448.89	125.47
759.89	193.47
861.89	156.47
793.89	508.47
306.89	151.47
324.89	279.47
300.89	124.47
655.89	157.47
311.89	514.47
750.89	221.47
284.89	122.47
342.89	133.47
515.89	152.47
1036.89	325.47
273.89	183.47
763.89	159.47
323.89	132.47
271.89	222.47
876.89	152.47
657.89	345.47
817.89	482.47
1110.89	376.47
316.89	299.47
369.89	295.47
333.89	183.47
829.89	188.47
976.89	187.47
304.89	138.47
274.89	314.47
724.89	933.47
766.89	247.47
714.89	1101.47
561.89	355.47
663.89	267.47
377.89	259.47
315.89	662.47
377.89	319.47
391.89	354.47
268.89	135.47
653.89	418.47
461.89	126.47
513.89	507.47
1014.89	169.47
686.89	151.47
1039.89	157.47
732.89	383.47
1120.89	196.47
1096.89	280.47
572.89	243.47
789.89	348.47
337.89	138.47
688.89	254.47
407.89	143.47
338.89	208.47
1229.89	321.47
422.89	181.47
295.89	246.47
455.89	692.47
576.89	216.47
494.89	602.47
790.89	163.47
751.89	142.47
707.89	519.47
476.89	276.47
324.89	120.47
397.89	192.47
298.89	254.47
1321.89	107.47
1810.89	120.47
569.89	269.47
711.89	164.47
340.89	451.47
427.89	129.47
508.89	189.47
428.89	549.47
604.89	363.47
441.89	540.47
550.89	618.47
466.89	246.47
426.89	454.47
325.89	224.47
320.89	563.47
406.89	368.47
345.89	113.47
366.89	150.47
695.89	183.47
400.89	630.47
523.89	155.47
821.89	169.47
897.89	410.47
718.89	167.47
684.89	186.47
576.89	258.47
563.89	121.47
391.89	530.47
351.89	360.47
1065.93	452.47
936.93	138.47
993.93	265.47
1320.93	204.47
949.93	209.47
999.93	330.47
957.93	254.47
826.93	411.47
615.93	263.47
742.93	248.47
531.93	178.47
737.93	120.47
942.93	141.47
770.93	247.47
713.93	115.47
276.93	157.47
942.93	296.47
1265.93	212.47
1242.93	219.47
839.93	155.47
478.93	145.47
370.93	147.47
581.93	152.47
883.93	138.47
975.93	125.47
584.93	185.47
1428.93	134.47
809.93	202.47
838.93	122.47
404.93	169.47
458.93	148.93
657.93	480.93
667.93	227.93
1374.93	382.93
967.93	437.93
652.93	140.93
658.93	142.93
727.93	140.93
468.93	502.93
288.93	165.93
810.93	191.93
895.93	175.93
897.93	277.93
746.93	138.93
449.93	302.93
599.93	738.93
315.93	505.93
622.93	476.93
1001.93	652.93
1114.93	451.93
988.93	278.93
518.93	480.93
504.93	722.93
868.93	629.93
612.93	347.93
696.93	264.93
481.93	539.93
891.93	411.93
280.93	463.93
562.93	459.93
746.93	153.93
259.93	237.93
876.93	173.93
492.93	321.93
624.93	200.93
721.93	200.93
1142.93	243.93
415.93	244.93
431.93	392.93
436.93	421.93
239.93	307.93
327.93	204.93
325.93	277.93
883.93	200.93
357.93	245.93
249.93	187.93
957.93	331.93
487.93	169.93
794.93	337.93
365.93	268.93
701.93	208.93
1302.93	198.93
537.93	301.93
276.93	131.93
329.93	379.93
709.93	146.93
484.93	242.93
242.93	129.93
1045.93	411.93
635.93	219.93
797.93	145.93
492.93	202.93
306.93	402.93
617.93	232.93
867.93	276.93
319.93	224.93
254.93	196.93
555.93	261.93
343.93	256.93
260.93	195.93
310.93	504.93
539.93	309.93
375.93	365.93
268.93	320.93
246.93	335.93
290.93	353.93
548.93	170.93
241.93	354.93
261.93	167.93
600.93	257.93
1013.93	245.93
358.93	369.93
284.93	298.93
323.93	592.93
1168.93	153.93
1778.93	148.93
381.93	169.93
298.93	276.93
846.93	183.93
311.93	204.93
390.93	239.93
436.93	157.93
281.93	147.93
235.93	285.93
275.93	163.93
183.99	138.93
413.99	391.93
181.99	249.93
261.99	150.93
1008.99	216.93
1238.99	121.93
1100.99	139.93
194.99	147.93
164.99	431.93
164.99	154.93
980.99	163.93
214.99	237.93
581.99	185.93
237.99	215.93
204.99	153.93
477.99	533.93
1086.99	329.93
1528.99	335.93
1075.99	444.93
804.99	160.93
292.99	307.93
899.99	417.93
885.99	168.93
440.99	173.93
164.99	145.93
606.99	218.93
737.99	156.93
163.99	238.93
182.99	187.93
187.99	219.93
297.99	154.93
262.99	235.93
984.99	182.93
182.99	299.93
325.99	703.93
226.99	417.93
229.99	378.93
324.99	240.93
178.99	178.93
191.99	206.93
345.99	315.93
207.99	288.93
229.99	233.93
199.99	193.93
188.99	153.93
176.99	138.93
239.99	348.93
658.99	219.93
211.99	226.93
371.99	124.93
448.99	259.93
791.99	222.93
878.99	153.93
347.99	295.93
1608.99	259.93
517.99	175.93
230.99	189.93
529.99	195.93
171.99	207.93
216.99	193.93
250.99	192.93
456.99
271.99
179.99
252.99
537.99
167.99
674.99
1161.99
593.99
226.99
784.99
201.99
736.99
274.99
382.99
234.99
184.99
243.99
185.99
579.99
522.99
587.99
367.99
157.99
201.99
173.99
449.99
478.99
583.99
546.99
216.99
442.99
228.99
186.99
301.99
277.99
332.99
250.99
286.99

## Sheet: Suppl Fig. 1-Abdominal NMJs
Figure 6 Source File for maximum pixel intensity analysis of complexin intensity
w- (wt) 1X		n=16 synapses (658 data points)
w- (wt) 2X		n=13 synapses (642 data points)
Statistical Analyses
Kolmogorov-Smirnov test
P value	< 0.0001
Exact or approximate P value?	Approximate
P value summary	****
Significantly different? (P < 0.05)	Yes
Kolmogorov-Smirnov D	0.205
Unpaired t test
P value	< 0.0001
P value summary	****
Significantly different? (P < 0.05)	Yes
One- or two-tailed P value?	Two-tailed
t, df	t=8.644 df=1298
Source data
Note: Values for maximum pixel intensities (m.p.i.) were corrected for background as described in the Methods.
w- (wt) 1X	w- (wt) 2X
1028.25	596.19
744.25	1094.19
881.25	944.19
513.25	614.19
654.25	1122.19
726.25	1497.19
1150.25	652.19
546.25	743.19
479.25	633.19
441.25	834.19
464.25	904.19
653.25	958.19
554.25	488.19
371.25	972.19
466.25	568.19
563.25	796.19
356.25	937.19
337.25	631.19
550.25	1180.19
362.25	1105.19
366.25	889.19
326.25	601.19
314.25	615.19
311.25	483.19
680.25	667.19
293.25	625.19
500.25	764.19
380.25	1169.19
343.25	873.19
366.25	542.19
359.25	969.19
406.25	700.19
504.25	434.19
567.25	616.19
338.25	393.19
335.25	423.19
894.32	640.19
1125.32	938.19
912.32	1139.19
775.32	503.19
911.32	397.19
738.32	717.19
586.32	491.19
751.32	960.19
993.32	463.19
516.32	533.19
465.32	1008.19
604.32	1032.19
514.32	1443.19
533.32	445.19
495.32	401.19
633.32	741.19
721.32	1080.19
564.32	1291.19
506.32	486.19
465.32	428.19
576.32	435.19
318.32	558.19
348.32	438.19
342.32	490.19
333.32	437.19
335.32	400.19
313.32	619.19
384.32	825.19
577.32	805.19
976.14	570.19
831.14	414.19
636.14	1852.19
613.14	594.19
530.14	698.19
542.14	518.19
574.14	507.19
1387.14	602.19
1216.14	446.19
1069.14	540.19
606.14	1798.19
534.14	662.19
795.14	668.19
373.14	535.19
466.14	909.19
430.14	966.19
479.14	460.19
975.14	1732.06
595.14	350.06
1297.14	1194.06
1254.14	961.06
934.14	1151.06
653.14	659.06
679.14	734.06
524.14	940.06
363.14	431.06
549.14	609.06
1066.14	446.06
742.14	427.06
376.14	907.06
353.14	431.06
381.14	426.06
395.14	581.06
536.14	467.06
503.14	988.06
610.14	594.06
503.14	413.06
502.14	819.06
388.38	395.06
385.38	697.06
914.38	432.06
344.38	371.06
781.38	410.06
723.38	860.06
637.38	457.06
1081.38	379.06
889.38	466.06
518.38	411.06
896.38	990.06
473.38	378.06
403.38	760.06
1112.38	844.06
839.38	431.06
313.38	431.06
388.38	336.06
311.38	489.06
777.38	436.06
434.38	833.06
745.38	905.06
287.38	386.06
382.38	377.06
354.38	364.06
680.38	604.06
659.38	741.06
588.38	977.06
317.38	528.06
322.38	674.06
1277.38	471.06
490.38	414.06
552.38	443.06
541.38	474.06
734.38	344.06
744.38	1155.86
822.38	1415.86
651.38	601.86
644.38	633.86
600.38	1764.86
721.38	1702.86
492.38	2352.86
332.38	1718.86
434.38	1664.86
563.38	2106.86
524.38	1714.86
502.38	1279.86
637.38	1046.86
520.38	1660.86
936.38	411.86
385.38	1711.86
325.38	435.86
414.38	399.86
347.38	922.86
478.38	442.86
335.38	674.86
410.38	1182.86
470.38	1102.86
752.38	982.86
591.38	683.86
531.38	409.86
341.38	799.86
588.38	750.86
672.38	1844.86
414.38	806.86
441.38	614.86
426.38	468.86
486.57	945.86
509.57	1485.86
684.57	1136.86
675.57	797.86
432.57	860.86
329.57	527.86
429.57	405.86
681.57	409.86
649.57	1232.86
789.57	945.86
481.57	371.86
285.57	846.86
293.57	828.86
271.57	505.86
208.57	483.86
483.57	1051.86
285.57	534.86
194.57	561.86
638.57	1010.86
499.57	552.86
199.57	488.86
524.57	561.86
348.57	479.86
208.57	368.86
218.57	353.86
211.57	392.86
272.57	381.86
198.57	461.86
478.57	514.86
225.57	360.86
232.57	387.86
485.57	451.86
290.57	379.86
227.57	426.86
224.57	623.5
248.57	890.5
735.69	1224.5
552.69	874.5
388.69	1250.5
552.69	958.5
446.69	457.5
378.69	516.5
362.69	512.5
293.69	461.5
477.69	1236.5
439.69	898.5
279.69	1629.5
264.69	1502.5
320.69	700.5
484.69	846.5
353.69	1614.5
440.69	463.5
495.69	1208.5
513.69	954.5
404.69	565.5
466.69	639.5
637.69	506.5
281.69	1009.5
193.69	541.5
279.69	557.5
254.69	621.81
255.69	622.81
256.69	564.81
183.69	426.81
294.69	531.81
259.69	489.81
234.69	458.81
209.69	384.81
195.69	598.81
192.69	847.81
192.69	312.81
214.69	315.81
210.69	513.81
295.69	312.81
195.69	421.81
280.69	484.81
284.69	362.81
262.69	527.81
275.69	545.81
239.69	349.81
274.69	399.81
811.27	405.81
585.27	386.81
386.27	369.81
755.27	294.81
491.27	361.81
552.27	413.81
476.27	403.81
711.27	332.81
770.27	363.81
266.27	386.43
310.27	316.43
882.27	402.43
715.27	346.43
584.27	289.43
468.27	316.43
698.27	273.43
262.27	285.43
343.27	1436.43
401.27	348.43
744.54	1689.43
621.54	270.43
285.54	1216.43
526.54	356.43
724.54	1431.43
289.54	735.43
622.54	817.43
532.54	1176.43
284.54	944.43
306.54	301.43
332.54	268.43
229.54	287.43
327.54	325.43
522.54	410.43
319.54	831.43
557.54	663.43
313.54	391.43
434.54	664.43
320.54	378.43
421.54	362.43
225.54	278.43
378.54	269.43
424.54	249.43
213.54	259.43
331.54	339.43
393.54	338.43
311.54	354.43
293.54	344.43
344.54	285.43
228.54	299.43
753.47	290.43
791.47	264.43
502.47	327.43
559.47	286.43
621.47	237.43
536.47	255.43
414.47	264.43
421.47	284.43
411.47	275.43
766.47	283.43
511.47	321.43
479.47	305.43
568.47	266.43
372.47	313.43
422.47	508.43
409.47	664.43
588.47	627.43
326.47	242.43
419.47	254.43
334.47	329.43
330.47	242.43
355.47	327.43
245.47	619.43
320.47	585.43
326.47	357.43
408.47	368.43
280.47	296.43
259.47	301.43
390.47	344.43
237.47	297.43
463.47	1441.57
489.47	431.57
327.47	821.57
305.47	613.57
520.47	679.57
331.47	700.57
253.47	371.57
310.47	591.57
293.47	1012.57
245.47	383.57
236.47	342.57
312.47	915.57
245.47	432.57
581.47	311.57
291.47	310.57
255.47	389.57
493.47	344.57
348.47	319.57
252.47	297.57
308.47	738.57
313.47	369.57
358.47	351.57
371.47	528.57
310.47	299.57
267.47	1470.57
310.47	1430.57
380.47	506.57
355.47	1312.57
540.24	1166.57
619.24	787.57
672.24	1118.57
368.24	378.57
314.24	1386.57
320.24	956.57
538.24	597.57
733.24	415.57
402.24	538.57
383.24	333.57
381.24	303.57
292.24	338.57
250.24	644.63
314.24	525.63
335.24	465.63
281.24	376.63
276.24	728.63
369.24	539.63
356.24	634.63
299.24	461.63
249.24	597.63
309.24	547.63
400.24	736.63
358.24	887.63
266.24	421.63
347.24	623.63
280.24	335.63
281.24	521.63
277.24	545.63
368.24	531.63
609.24	420.63
252.24	508.63
263.24	400.63
273.24	433.63
299.24	340.63
335.24	716.63
380.24	423.63
368.24	536.63
366.24	515.63
323.24	498.63
357.24	665.63
529.24	500.63
464.24	773.63
406.24	497.63
435.24	299.63
292.24	374.63
298.24	400.63
406.24	461.63
334.24	573.63
372.24	367.63
344.24	350.63
406.24	421.63
303.24	389.63
331.24	615.63
607.24	495.63
585.24	421.63
296.24	419.63
320.24	383.63
351.24	445.63
295.24	641.63
284.24	403.63
1326.75	675.63
1294.75	326.63
971.75	381.63
434.75	857.59
767.75	827.59
614.75	748.59
914.75	435.59
376.75	825.59
736.75	427.59
902.75	516.59
913.75	600.59
350.75	882.59
362.75	419.59
327.75	392.59
356.75	665.59
371.75	558.59
390.75	372.59
736.75	322.59
758.75	450.59
865.75	537.59
667.75	558.59
702.75	379.59
458.75	406.59
622.75	369.59
385.75	414.59
594.75	313.59
669.75	396.59
897.75	306.59
465.75	804.59
784.75	415.59
383.75	536.59
395.75	650.59
853.75	573.59
875.75	417.59
1118.75	608.59
943.75	371.59
487.75	358.59
404.75	336.59
402.75	966.59
558.75	696.59
541.75	487.59
588.75	476.59
624.75	389.59
389.75	378.59
578.75	655.59
408.75	355.59
497.75	686.59
758.75	622.59
729.75	690.59
1578.75	787.59
394.75	438.59
683.75	345.59
450.75	337.59
389.75	335.59
876.75	366.59
425.75	384.59
526.75	764.59
538.75	347.59
677.75	392.59
575.75	592.59
361.75	465.59
298.75	455.59
733.75	384.59
567.75	397.59
476.75	588.59
1028.75	523.59
479.75	525.59
388.75	929.01
360.75	617.01
334.75	569.01
389.75	525.01
339.75	694.01
409.75	817.01
344.75	483.01
424.75	1035.01
323.75	1044.01
345.75	770.01
859.75	1081.01
1567.75	527.01
295.75	509.01
389.75	496.01
332.75	690.01
688.53	1113.01
927.53	548.01
1050.53	538.01
911.53	685.01
870.53	1275.01
642.53	1534.01
645.53	1158.01
643.53	1329.01
586.53	453.01
529.53	619.01
413.53	526.01
686.53	1782.01
769.53	1333.01
668.53	1208.01
729.53	1423.01
806.53	976.01
618.53	952.01
479.53	1429.01
476.53	636.01
348.53	728.01
773.53	483.17
653.53	889.17
1252.53	1257.17
991.53	1048.17
717.53	692.17
440.53	1016.17
723.53	1419.17
534.53	461.17
816.53	774.17
1168.53	1097.17
499.53	722.17
1333.53	1183.17
858.53	806.17
752.53	1019.17
508.53	1049.17
630.53	551.17
716.53	619.17
616.53	965.17
453.31	718.17
1663.31	763.17
1582.31	784.17
1422.31	979.17
1220.31	849.17
1097.31	1069.17
915.31	1447.17
838.31	553.17
387.31	571.17
720.31	998.17
723.31	1018.17
1326.31	640.17
1403.31	715.17
1326.31	520.17
696.31	547.17
902.31	659.17
1507.31	522.17
428.31	474.17
822.31	587.17
1398.31	470.17
1020.31	505.17
424.31	554.17
595.31	490.17
975.31	485.17
451.31	723.84
793.31	585.84
614.31	806.84
493.31	459.84
1750.31	487.84
540.31	872.84
693.31	563.84
1258.31	1017.84
428.31	582.84
734.31	645.84
756.31	469.84
1068.31	521.84
513.31	860.84
613.31	700.84
1004.31	598.84
557.31	715.84
541.31	447.84
481.31	986.84
572.51	902.84
534.51	386.84
834.51	529.84
824.51	758.84
422.51	462.84
441.51	551.84
354.51	430.84
512.51	594.22
554.51	1594.22
442.51	976.22
482.51	557.22
465.51	1449.22
1254.51	971.22
216.51	528.22
610.05	1048.22
583.05	743.22
515.05	656.22
450.05	715.22
1086.05	611.22
1002.05	667.22
460.05	959.22
455.05	786.22
766.05	1684.22
288.05	1499.22
292.05	693.22
297.05	589.22
289.05	508.22
320.05	453.22
919.05	456.22
377.05	615.22
358.05	634.22
338.05	873.22
384.05	1093.22
300.05	1311.22
290.05	1600.22
292.05	628.22
378.05	700.22
299.05	690.22
277.05	1679.22
691.05	667.22
464.05	1501.22
360.05	902.22
436.05	1172.22
353.05	1064.22
285.05	529.22
314.05	1184.22
282.05	617.22
365.05	678.22
287.05	551.22
301.05	1382.22
260.05	1118.22
351.05	1138.22
275.05	1515.22
634.05	695.22
503.05	835.22
424.05	1065.22
412.05	616.22
270.05	898.22
370.05	582.22
475.05	554.22
375.05	505.22
434.05	519.22
340.05
263.05
298.05
656.09
691.09
361.09
272.09
505.09
530.09
711.09
509.09
328.09
784.09
269.09
271.09
433.09
